# Supplementary material for: Southern Species From the Biodiversity Hotspot of Central Chile: A Source of Color, Aroma, and Metabolites for Global Agriculture and Food Industry in a Scenario of Climate Change
Source: PubMed Central journal article supplement (PMC7348657; doi:10.3389/fpls.2020.01002), 2020-07-02
Supplement: DataSheet_1.pdf [file DataSheet_1.pdf]

Supplementary Table 1. List of the localities where southern crops were identified and used in climate analysis in WorldClim 1 and WorldClim 2.

| N <sup>a</sup> | Specie                                     | Locality        | Lat.               | Long.              | Alt.<br>(m asl) | Köppen-Geiger<br>climate                                              | Köppen-<br>Geiger code |
|----------------|--------------------------------------------|-----------------|--------------------|--------------------|-----------------|-----------------------------------------------------------------------|------------------------|
| 1              | <i>V. pubescens</i>                        | La Serena       | 29° 58'<br>30.0" S | 71° 13'<br>39.4" W | 225             | Cold Semi-arid<br>climate with dry<br>summer and<br>oceanic influence | BSk (s) (i)            |
| 2              | <i>V. pubescens</i>                        | Valle del Elqui | 30° 00'<br>58.1" S | 71° 01'<br>31.6" W | 320             | Cold Semi-arid<br>climate with dry<br>summer                          | BSk (s)                |
| 3              | <i>V. pubescens</i>                        | Ovalle          | 30° 35'<br>43.8" S | 71° 22'<br>30.3" W | 270             | Cold Semi-arid<br>climate with dry<br>summer                          | BSk (s)                |
| 4              | <i>V. pubescens</i>                        | Huentelauquen   | 31° 34'<br>54.7" S | 71° 31'<br>53.9" W | 65              | Cold Semi-arid<br>climate with dry<br>summer and<br>oceanic influence | BSk (s) (i)            |
| 5              | <i>V. pubescens</i>                        | La Ligua        | 32° 23'<br>35.5" S | 71° 22'<br>28.9" W | 35              | Cold Semi-arid<br>climate with dry<br>summer                          | BSk (s)                |
| 6              | <i>V. pubescens</i>                        | Lipimavida      | 34° 50'<br>48.9" S | 72° 08'<br>30.8" W | 20              | Mediterranean<br>climate (warm<br>summer)                             | Csb                    |
| 7              | <i>V. pubescens</i>                        | Iloca           | 34° 55'<br>50.0" S | 72° 10'<br>53.2" W | 4               | Mediterranean<br>climate (warm<br>summer)                             | Csb                    |
| 8              | <i>V. pubescens</i>                        | Curanipe        | 35° 50'<br>11.7" S | 72° 37'<br>50.4" W | 20              | Mediterranean<br>climate (warm<br>summer) with<br>oceanic influence   | Csb (i)                |
| 9              | <i>V. pubescens</i>                        | Cobquecura      | 36° 04'<br>18.8" S | 72° 49'<br>9.90" W | 20              | Mediterranean<br>climate (warm<br>summer) with<br>oceanic influence   | Csb (i)                |
| 10             | <i>V. pubescens</i>                        | Lleu-Lleu       | 38° 06'<br>47.9" S | 73° 16'<br>53.9" W | 50              | Mediterranean<br>climate (warm<br>summer)                             | Csb                    |
| 1              | <i>F. chilensis</i> f.<br><i>chilensis</i> | Pelluhue        | 35° 50'<br>7.19" S | 72° 35'<br>14.8" W | 160             | Mediterranean<br>climate (warm<br>summer) with<br>oceanic influence   | Csb (i)                |
| 2              | <i>F. chilensis</i> f.<br><i>chilensis</i> | Huelon Alto     | 35° 05'<br>32.3" S | 72° 03'<br>39.6" W | 46              | Mediterranean<br>climate (warm<br>summer)                             | Csb                    |

**Southern species as new crops**

|   |                                          |                    |                    |                    |       |                                                                        |             |
|---|------------------------------------------|--------------------|--------------------|--------------------|-------|------------------------------------------------------------------------|-------------|
| 3 | <i>F. chilensis</i> f. <i>chilensis</i>  | Llongocura         | 35° 10'<br>10.1" S | 71° 59'<br>20.6" W | 134   | Mediterranean climate (warm summer)                                    | Csb         |
| 4 | <i>F. chilensis</i> f. <i>chilensis</i>  | Purén              | 38° 03'<br>14.6" S | 73° 11'<br>41.3" W | 612   | Mediterranean climate (warm summer)                                    | Csb         |
| 1 | <i>F. chilensis</i> f. <i>patagonica</i> | Vilches Alto       | 35° 36'<br>29.9" S | 71° 04'<br>3.20" W | 1,220 | Mediterranean climate (warm summer) with mountain influence            | Csb (h)     |
| 2 | <i>F. chilensis</i> f. <i>patagonica</i> | Termas de Chillán  | 36° 55'<br>0.30" S | 71° 27'<br>12.4" W | 1,285 | Mediterranean climate (warm summer) with mountain influence            | Csb (h)     |
| 3 | <i>F. chilensis</i> f. <i>patagonica</i> | Cuesta Las Raices  | 38° 26'<br>22.4" S | 71° 30'<br>38.9" W | 1,200 | Marine West Coast climate (warm and dry summer)                        | Cfb (s)     |
| 4 | <i>F. chilensis</i> f. <i>patagonica</i> | Termas Geométricas | 39° 31'<br>50.8" S | 71° 55'<br>51.8" W | 692   | Marine West Coast climate (warm and dry summer)                        | Cfb (s)     |
| 5 | <i>F. chilensis</i> f. <i>patagonica</i> | Curiñanco          | 39° 45'<br>17.2" S | 73° 23'<br>23.3" W | 5     | Marine West Coast climate (warm and dry summer) with oceanic influence | Cfb (s) (i) |
| 6 | <i>F. chilensis</i> f. <i>patagonica</i> | Cuesta Gutierrez   | 41° 19'<br>58.2" S | 73° 17'<br>41.7" W | 68    | Marine West Coast climate (warm summer) with oceanic influence         | Cfb (i)     |
| 7 | <i>F. chilensis</i> f. <i>patagonica</i> | Caulín             | 41° 48'<br>3.41" S | 73° 40'<br>29.5" W | 6     | Marine West Coast climate (warm summer)                                | Cfb         |
| 8 | <i>F. chilensis</i> f. <i>patagonica</i> | Cucao              | 42° 38'<br>50.9" S | 74° 06'<br>58.5" W | 3     | Marine West Coast climate (warm and dry summer)                        | Cfb (s)     |
| 9 | <i>F. chilensis</i> f. <i>patagonica</i> | Coyhaique          | 45° 32'<br>22.6" S | 72° 00'<br>54.0" W | 605   | Mediterranean climate (mild summer)                                    | Csc         |

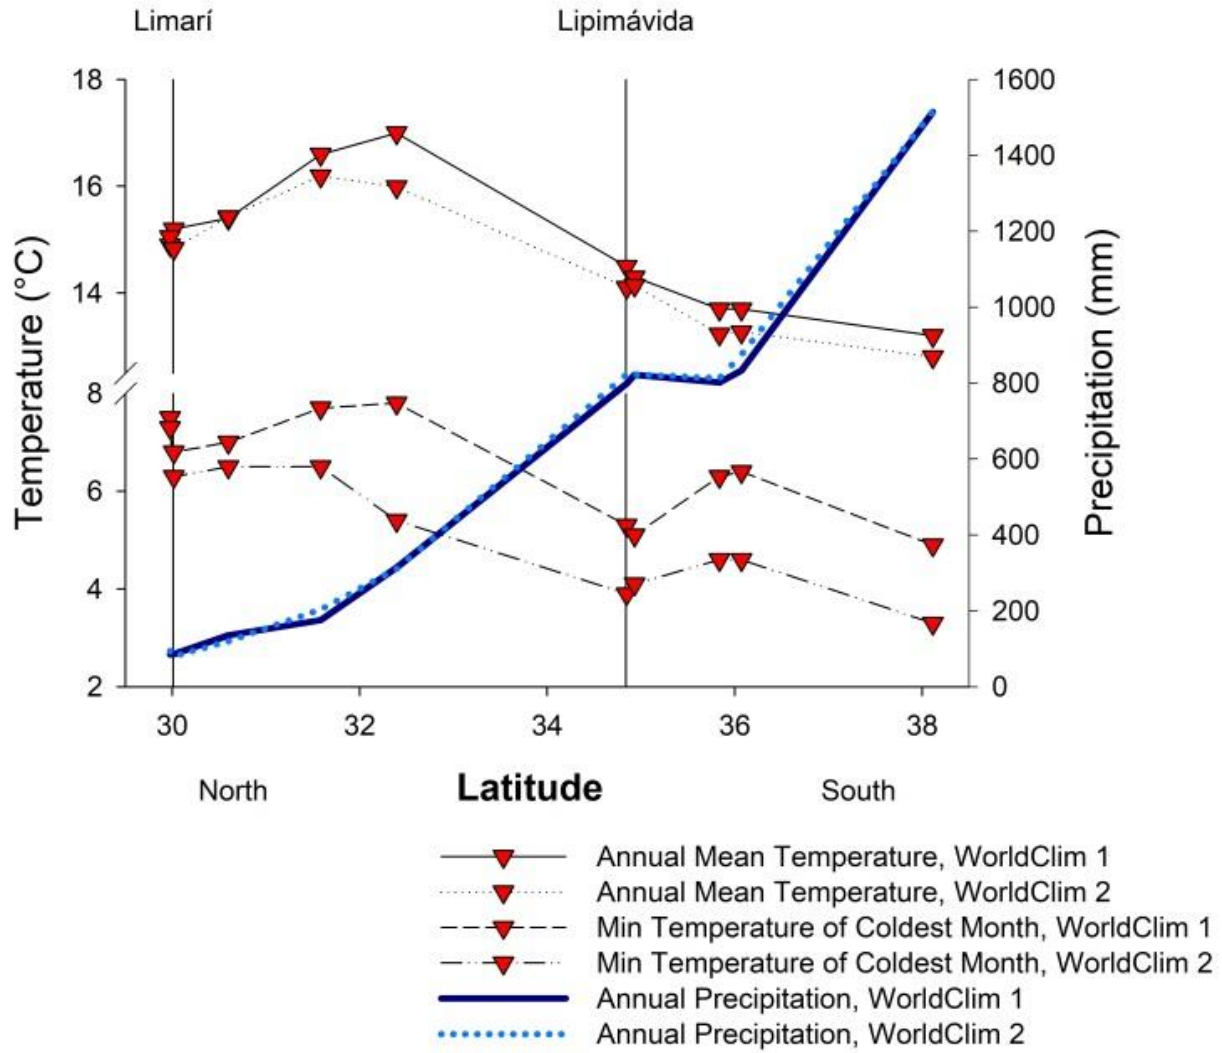

**Supplementary Figure 1.** Climatic characterization of cultivated localities for *V. pubescens* distributed from North to South. Bioclimatic variables of WorldClim 1 and 2 is shown. On the X axis, the localities of Limarí and Lipimávida are shown as reference, previously shown in Figure 1.

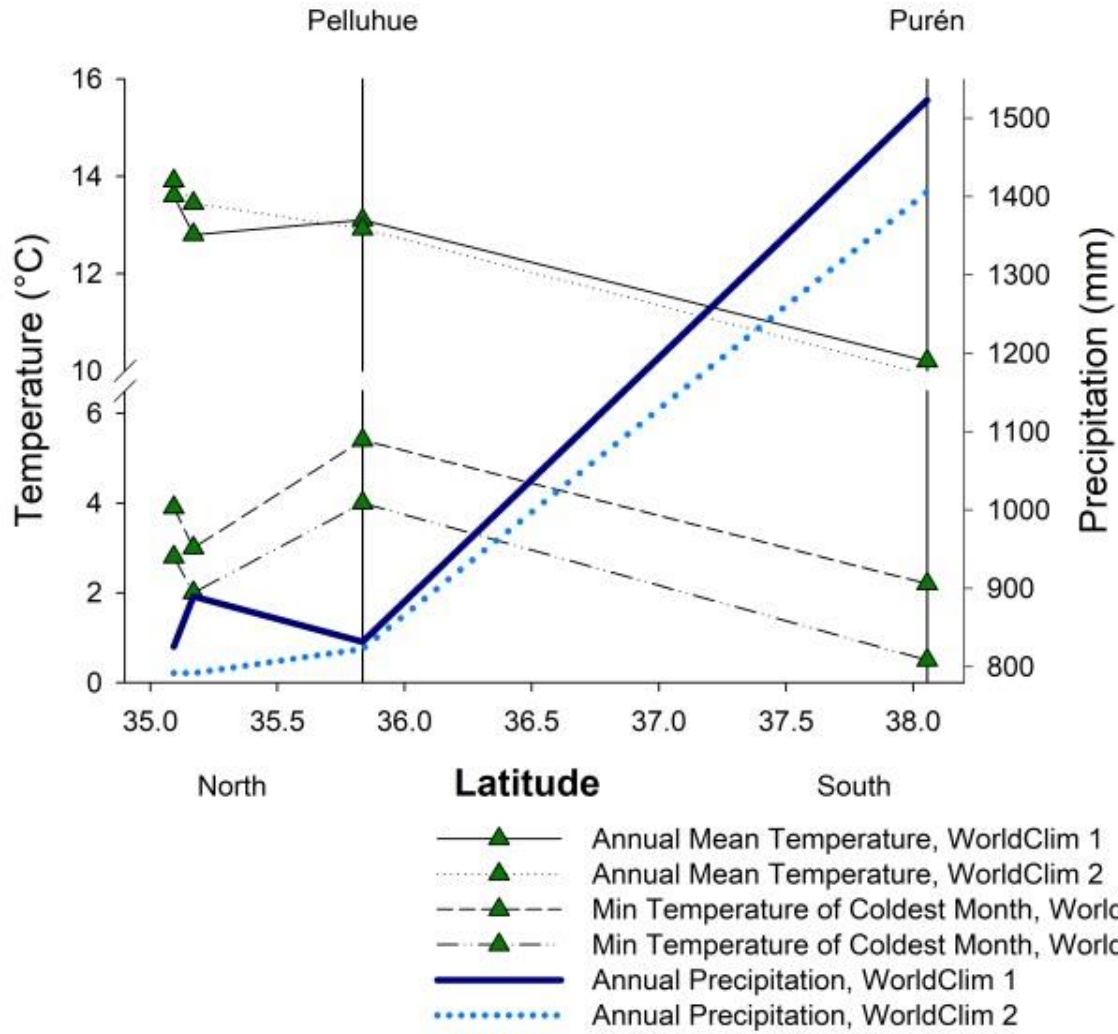

**Supplementary Figure 2.** Climatic characterization for the cultivated localities of *F. chilensis* f. *chilensis* distributed from North to South. Bioclimatic variables of WorldClim 1 and 2 is shown. The localities of Pelluhue and Purén are shown as reference in the X axis.

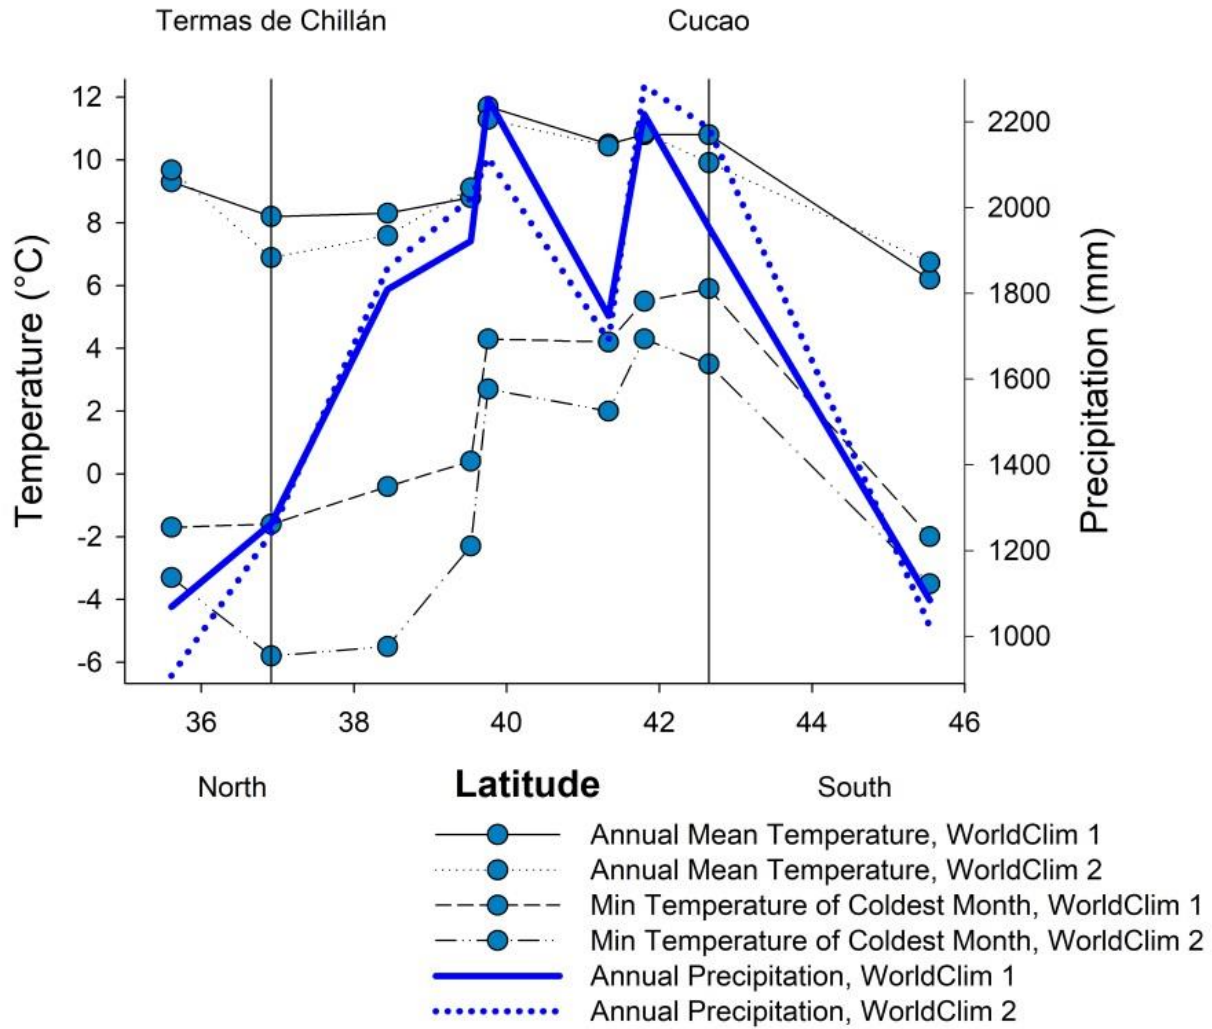

**Supplementary Figure 3.** Climatic characterization of the localities for wild *F. chilensis* f.

*patagonica* distributed from North to South. Bioclimatic variables of WorldClim 1 and 2 is shown.

The localities of Termas de Chillán and Cucao are shown as reference in the X axis, which are previously shown in Figure 1.
